# Supplementary material
Source: publisher site journal article supplement (https://www.spandidos-publications.com/6529/downloadSupplementary)

Figure S1. (A) Tumor cells were positive for cytokeratin 7 (magnification, x100). (B) Elastic fiber staining demonstrated discontinuous or fractured elastic fibers in papillary adenoma tissue (magnification, x100).

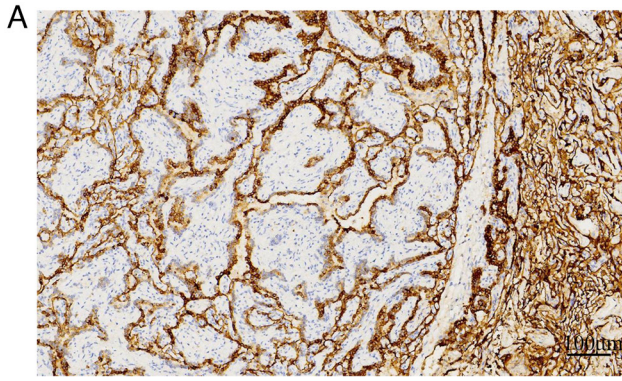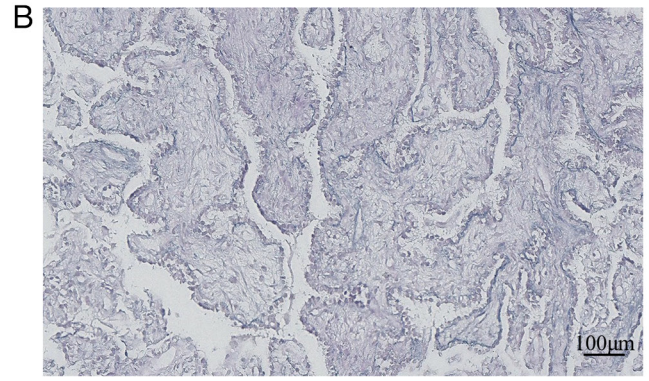

Supplement: Supplementary file 1 [file downloadSupplementary]
